# Supplementary material for: Metformin Acts on Two Different Molecular Pathways to Enhance Adult Neural Precursor Proliferation/Self-Renewal and Differentiation
Source: PubMed Central journal article supplement — Stem Cell Reports. 2015 Nov 19;5(6):988–95. doi: 10.1016/j.stemcr.2015.10.014 (PMC4682208; doi:10.1016/j.stemcr.2015.10.014), 2015-11-19
Supplement: mmc2.pdf [file mmc2.pdf]

## Metformin Acts on Two Different Molecular Pathways to Enhance Adult Neural Precursor Proliferation/Self-Renewal and Differentiation

Michael Fatt,<sup>1,3,10</sup> Karolynn Hsu,<sup>2,10</sup> Ling He,<sup>8</sup> Fredric Wondisford,<sup>9</sup> Freda D. Miller,<sup>1,3,4,5</sup> David R. Kaplan,<sup>1,3,4</sup> and Jing Wang<sup>2,6,7,\*</sup>

<sup>1</sup>Program in Neurosciences and Mental Health, Hospital for Sick Children, Toronto, ON M5G 1X8, Canada

<sup>2</sup>Regenerative Medicine Program, Ottawa Hospital Research Institute, Ottawa, ON K1H 8L6, Canada

<sup>3</sup>Institute of Medical Science

<sup>4</sup>Department of Molecular Genetics

<sup>5</sup>Department of Physiology

University of Toronto, Toronto, ON M5G 1X5, Canada

<sup>6</sup>Department of Cellular and Molecular Medicine

<sup>7</sup>Brain and Mind Research Institute

University of Ottawa, Ottawa, ON K1H 8M5, Canada

<sup>8</sup>Department of Pediatrics and Medicine, Johns Hopkins Medical School, Baltimore, MD 21287, USA

<sup>9</sup>Department of Medicine, Rutgers Robert Wood Johnson Medical School, New Brunswick, NJ 08901, USA

<sup>10</sup>Co-first author

\*Correspondence: [jwang@ohri.ca](mailto:jwang@ohri.ca)

<http://dx.doi.org/10.1016/j.stemcr.2015.10.014>

This is an open access article under the CC BY-NC-ND license (<http://creativecommons.org/licenses/by-nc-nd/4.0/>).

### SUMMARY

The recruitment of endogenous adult neural stem cells for brain repair is a promising regenerative therapeutic strategy. This strategy involves stimulation of multiple stages of adult neural stem cell development, including proliferation, self-renewal, and differentiation. Currently, there is a lack of a single therapeutic approach that can act on these multiple stages of adult neural stem cell development to enhance neural regeneration. Here we show that metformin, an FDA-approved diabetes drug, promotes proliferation, self-renewal, and differentiation of adult neural precursors (NPCs). Specifically, we show that metformin enhances adult NPC proliferation and self-renewal dependent upon the p53 family member and transcription factor TAp73, while it promotes neuronal differentiation of these cells by activating the AMPK-aPKC-CBP pathway. Thus, metformin represents an optimal candidate neuro-regenerative agent that is capable of not only expanding the adult NPC population but also subsequently driving them toward neuronal differentiation by activating two distinct molecular pathways.

### INTRODUCTION

The observation of adult neural stem cells in the mammalian brain (Imayoshi et al., 2008; Reynolds and Weiss, 1992; Zhao et al., 2008) suggested that these stem cells could be mobilized for the repair of the injured or degenerating brain. A growing body of literature shows that adult neural stem cells are recruited in response to neural injury or degeneration, representing an attempt at endogenous repair (Kernie and Parent, 2010; Mitchell et al., 2004). However, this level of endogenous repair was not sufficient to repair the damaged brain. Thus, extensive efforts are underway to harness endogenous neural precursor cells (NPCs) as a novel regenerative therapeutic strategy to treat neural injury or brain degeneration. The recruitment of endogenous adult NPCs involves stimulation of multiple stages of adult NPC development, including proliferation, self-renewal, and differentiation. Thus, an optimal regenerative strategy would stimulate both proliferation/self-renewal and neuronal differentiation in order to generate sufficient numbers of new neurons to replace those lost after brain injury or degeneration.

Metformin, an FDA (Food and Drug Administration)-approved diabetes drug, was recently shown to promote adult neurogenesis under both physiological and pathological conditions in vivo (Liu et al., 2014; Jin et al., 2014; Wang et al., 2012). However, metformin has multiple molecular actions (Pernicova and Korbonits, 2014), and it is still not clear which ones are important for its neural effects. For example, metformin activates atypical protein kinase C (aPKC)-mediated CREB-binding protein (CBP) phosphorylation to regulate gluconeogenic gene expression in liver cells and enhance embryonic murine and human NPC differentiation (He et al., 2009; Wang et al., 2012). Moreover, metformin increases the levels of the p53 family member transcription factor TAp73 in cancer cells (Engelmann et al., 2015; Rosenbluth et al., 2008), and TAp73 is essential for adult NPC self-renewal and proliferation (Fujitani et al., 2010), suggesting that this protein might also be important for metformin's effects in the brain.

Here, we show that metformin treatment enhances both proliferation/self-renewal and neuronal differentiation of adult NPCs by activating two different molecular pathways. Metformin increases adult NPC proliferation/self-renewal

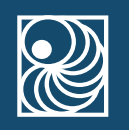

via Tap73 while it promotes neuronal differentiation by activating the AMPK-aPKC-CBP pathway. Thus, metformin represents an optimal neuroregenerative agent to recruit endogenous neural stem cells to replace the loss of neural cells after brain injury and degeneration.

## RESULTS

### Metformin Enhances Proliferation/Self-Renewal and Neuronal Differentiation of Adult NPCs

Previously, we showed that metformin, an FDA-approved diabetes drug, promotes embryonic murine and human NPC differentiation in culture and adult neurogenesis in vivo (Wang et al., 2012). To ask whether metformin acts on multiple stages of adult neural precursor development to increase adult murine neurogenesis in vivo, we used adult subventricular zone (SVZ) neurosphere cultures as a model system to assess functional roles of metformin in regulating the proliferation, self-renewal, and neuronal differentiation of adult NPCs. First, we examined primary neurosphere formation. Metformin (500 nM), added to freshly isolated SVZ NPCs for 6 days, robustly increased the number and size of primary neurospheres, indicators of self-renewal and proliferation, respectively (Figures 1A–1C). Metformin treatment of primary neurospheres also enhanced the number and size of secondary and tertiary neurospheres that were passaged every 4 days in the absence of metformin (Figures 1D and 1E), indicating that transient metformin treatment produces sustained NPC self-renewal and proliferation responses. Second, we treated dissociated NPCs derived from primary neurospheres with metformin (1  $\mu$ M) for 7 days. Metformin treatment significantly increased the number of secondary neurospheres (Figure 1F), again indicating augmented self-renewing ability. Third, metformin significantly enhanced neuronal differentiation (Figures 1G and 1H), as we have previously published for embryonic NPCs (Wang et al., 2012). Finally, we examined the effect of metformin on adult NPC survival. Monolayer-cultured adult NPCs were treated with metformin (500 nM or 1  $\mu$ M) for 2 days and assessed for cleaved caspase-3 by immunostaining and condensed nuclei. NPCs underwent apoptosis at a relatively low rate (~5%) in both vehicle (PBS) and metformin-treated cultures at 500 nM, while apoptosis was decreased to ~3% by 1  $\mu$ M metformin (Figure S1). Therefore, inhibition of apoptosis was most likely not a major contributor to the robust increase in the number and size of adult neurospheres induced by metformin treatment.

We performed similar experiments in vivo, treating adult mice with metformin intraperitoneally (i.p.; 200 mg/kg) for 7 days, followed by a single bromodeoxyuridine (BrdU) injection (i.p., 100 mg/kg to mark proliferating

NPCs). Mice were sacrificed 24 hr later to assess the total number of BrdU-positive cells, which represent cycling NPCs. Metformin treatment in vivo significantly expanded the BrdU-positive NPC populations in the SVZ (Figures 1I and 1J), consistent with the SVZ neurosphere data. We also assessed the number of BrdU-positive cells in the subgranular zone (SGZ) of the dentate gyrus, the other major neurogenic region in the adult brain. As seen in the SVZ, metformin increased the total relative number of BrdU-positive cells in the SGZ (Figures 1K and 1L). Thus, metformin promotes multiple stages of adult NPC development including proliferation, self-renewal, and neuronal differentiation.

### Tap73 Is Required for Metformin-Enhanced Proliferation and Self-Renewal of Adult NPCs

Based on our previous work showing that aPKC-mediated CBP phosphorylation at S436 is required for metformin-stimulated differentiation of embryonic NPCs, we asked whether this pathway was also involved in metformin-induced proliferation and/or self-renewal of adult NPCs. To do this, we performed adult neurosphere culture of wild-type (WT) mice in the presence of a pan-PKC inhibitor, chelerythrine, and adult neurosphere culture from a phospho-mutant CBPS436A knockin (*CBPS436A-KI*) mouse strain, in which the aPKC-CBP pathway is deficient due to the change of the serine (S) 436 residue to alanine (A) in the aPKC phosphorylation site of the CBP allele (Zhou et al., 2004). Quantification showed that chelerythrine did not block the increase in neurosphere formation induced by metformin (Figures 2A and 2B). Consistent with these data, metformin enhanced the number of primary and secondary neurospheres cultured from adult *CBPS436A-KI* as well as WT mice (Figures 2C and 2D).

These data suggest that metformin must act through a second pathway to enhance the proliferation and self-renewal of adult NPCs. In this regard, in cancer cells, metformin increases Tap73 levels (Engelmann et al., 2015; Rosenbluth et al., 2008), and Tap73 is essential for adult NPC self-renewal and proliferation (Fujitani et al., 2010). Therefore, we asked whether metformin might act via Tap73 to promote NPC self-renewal and proliferation. First, we determined whether metformin increased Tap73 mRNA levels in NPCs as it does in cancer cells. qRT-PCR of primary adult neurosphere mRNA showed that *Tap73* expression levels were significantly increased by metformin treatment (Figure 2E). Next, we investigated whether Tap73 was responsible for the metformin-induced increase in NPC proliferation and self-renewal. To assess this, we isolated adult SVZ neurospheres from mice where Tap73 is specifically knocked out (Tomasini et al., 2008) and treated them for 6 days with 500 nM metformin. Metformin enhanced the number of neurosphere-initiating cells

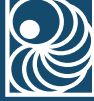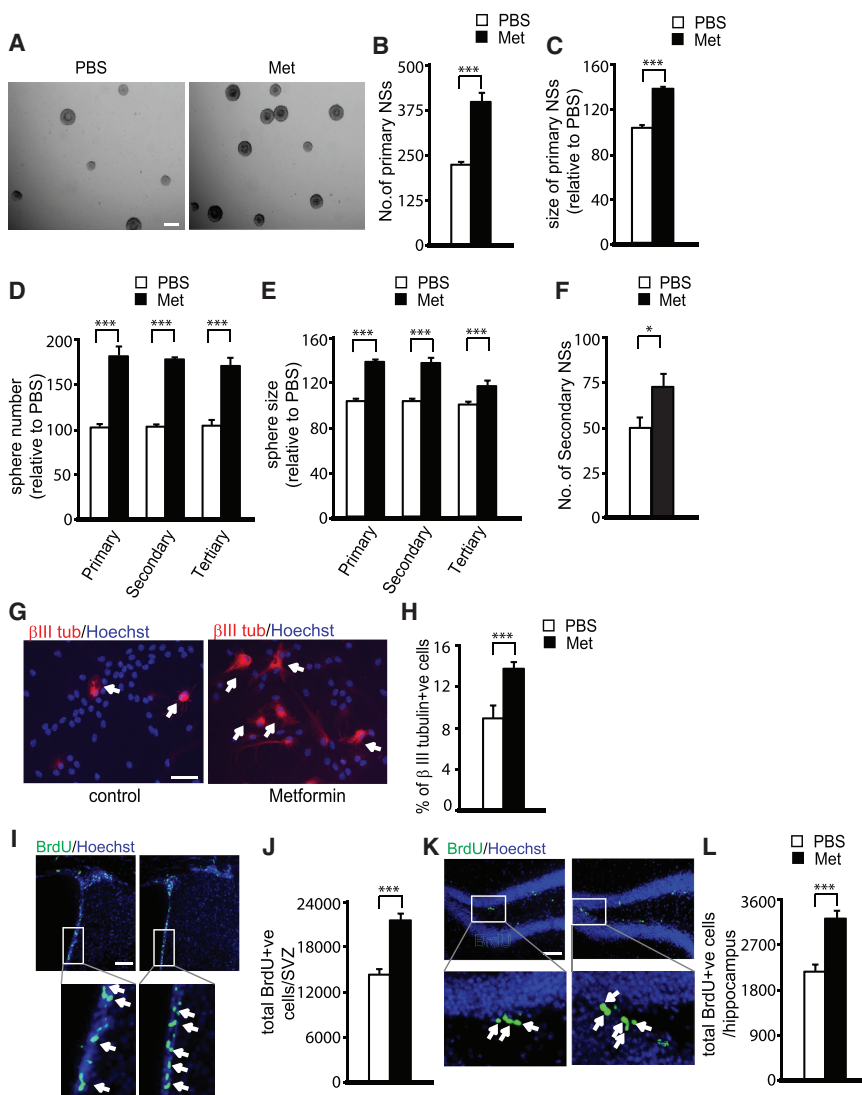

### Figure 1. Metformin Enhances the Self-Renewal and Neuronal Differentiation of Adult Neural Precursors

(A–C) Primary neurospheres cultured from the adult SVZ were grown in the presence or absence of 500 nM metformin (Met) and quantified 6 days later, as pictured in (A). Scale bar, 200  $\mu$ m. (B) Quantification of primary neurosphere (NS) number following metformin or PBS exposure. \*\*\* $p \leq 0.001$  ( $n = 5$  for each group). (C) Quantification of the neurosphere diameter following metformin or PBS exposure, as in (A). \*\*\* $p \leq 0.001$  (pooled data from five independent experiments).

(D and E) Primary neurospheres were passaged either once (secondary) or twice (tertiary) into untreated media, and the number (D) and diameter (E) of spheres was quantified 4 days later. \*\*\* $p \leq 0.001$  ( $n = 4$  for each group).

(F) Quantitative analysis of number of secondary neurospheres in the absence and presence of metformin (1  $\mu$ M). \* $p < 0.05$  (pooled data from four independent experiments).

(G) Immunofluorescence images of  $\beta$ III-tubulin ( $\beta$ III tub)-positive neurons generated from SVZ adult neurospheres in the absence and presence of metformin. Arrows denote  $\beta$ III-tubulin-positive cells. Scale bar, 50  $\mu$ m.

(H) Quantitative analysis of the percentage of  $\beta$ III-tubulin-positive ( $\beta$  III tubulin+ive) neurons generated in the absence and presence of metformin (200 nM), as shown in (G). \*\*\* $p < 0.001$  (pooled data from four independent experiments).

(I–L) In (I) and (K), fluorescence photomicrographs are shown of coronal SVZ (I) and SGZ (K) sections from 3-month-old WT mice that received PBS or metformin daily by injection (i.p., 200 mg/kg) for 7 days, followed by a single BrdU (100 mg/kg) injection 24 hr before. Sections were stained for BrdU (green) and counterstained with Hoechst 33258 (blue). Scale bar, 100  $\mu$ m. (J and L) Quantitative analysis of total number of BrdU-positive (BrdU+ve) precursor cells within the SVZ (J) and SGZ (L) regions, determined from sections as shown in (I) and (K). \*\*\* $p < 0.001$  (pooled data from three independent experiments). Arrows denote BrdU-positive cells.

Error bars indicate SEM.

See also [Figure S1](#).

cultured from the  $TAp73^{+/+}$  but not  $TAp73^{-/-}$  SVZ (Figures 2F and 2G). Moreover, when these spheres were passaged, the  $TAp73^{-/-}$  cells gave rise to fewer neurospheres, as previously published (Fujitani et al., 2010), and these numbers did not increase with metformin treatment (Figure 2H). To determine whether  $TAp73$  was also required for metformin-mediated NPC self-renewal and proliferation in vivo, we injected adult  $TAp73^{-/-}$  mice with metformin and BrdU, as described earlier, and the number of BrdU-positive SVZ cells was quantified. This analysis showed that there

were fewer BrdU-positive cells in the SVZ of adult  $TAp73^{-/-}$  mice as compared to  $TAp73^{+/+}$  mice (Figures 2I and 2J). Additionally, the number of BrdU-positive cells in  $TAp73^{-/-}$  mice was unaffected by metformin administration, whereas BrdU-positive cells increased in  $TAp73^{+/+}$  mice treated with metformin. Similar results were obtained when we analyzed the other neurogenic zone of the same mice, the dentate gyrus SGZ (Figure 2K). Thus,  $TAp73$  is required for the metformin-mediated enhancement of adult NPC proliferation and self-renewal.

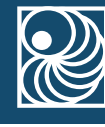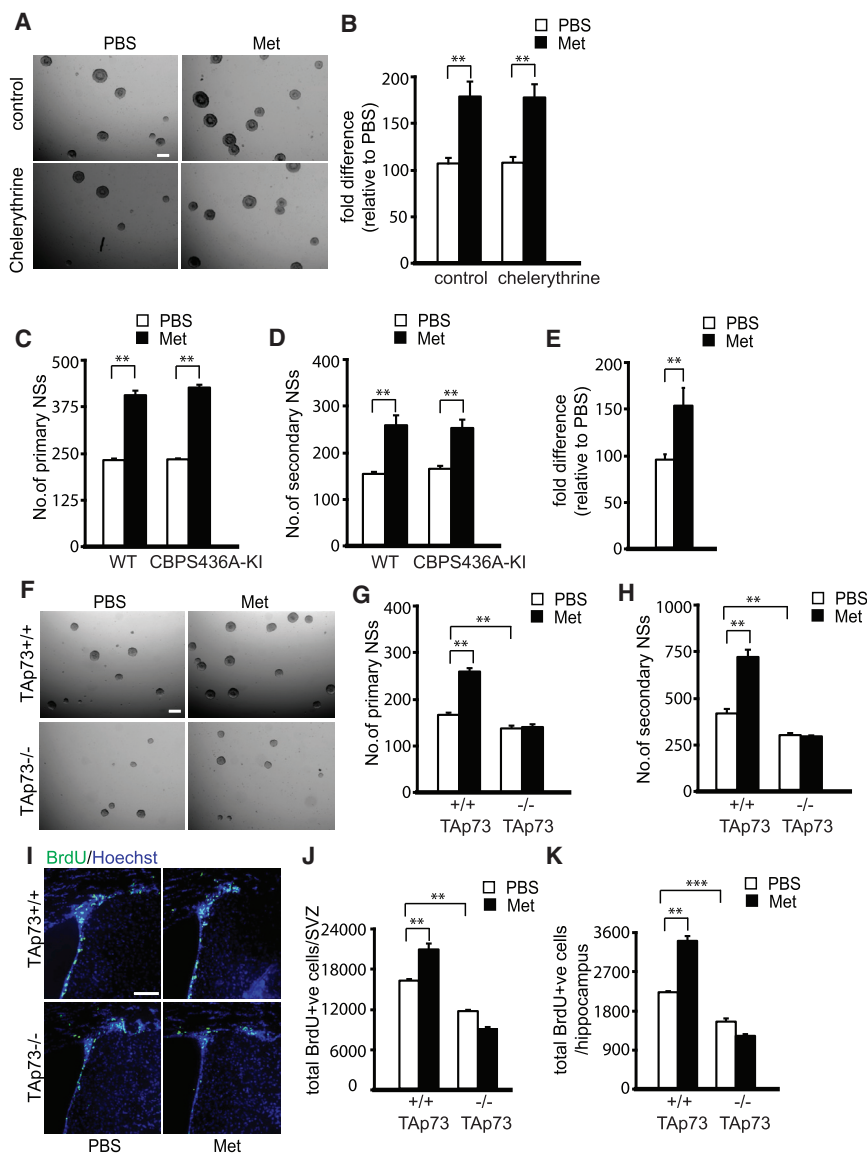

**Figure 2. TAp73 Is Required for Metformin-Induced Self-Renewal and Proliferation of Adult Neural Precursors**

(A and B) Primary neurospheres (NSs) were cultured from the SVZ of adult mice (3 months old) in the presence or absence of metformin (Met) and treated with the pan-PKC inhibitor, chelyerythrine. (B) Quantification of primary neurospheres following 6 days in culture was done based on representative micrographs shown in (A). Scale bar, 200  $\mu$ m.  $**p \leq 0.01$  (pooled data from four independent experiments).

(C) The SVZ of 3-month-old WT and *CBPS436A-KI* mice was dissected and cultured, and primary neurosphere formation was quantified 6 days later in the presence and absence of metformin.  $**p \leq 0.01$ . (pooled data from three independent experiments).

(D) Metformin- or PBS-treated primary neurospheres (as in A) from both genotypes were passaged into untreated media, and the number of secondary neurospheres was quantified 4 days later.  $**p \leq 0.01$ . (pooled data from three independent experiments).

(E) qRT-PCR for *TAp73* mRNA performed on RNA extracted from primary neurospheres grown in the presence or absence of metformin.  $**p \leq 0.01$  ( $n = 4$  for each group).

(F–H) Primary neurospheres were cultured from the SVZ of 3-month-old *TAp73<sup>+/+</sup>* and *TAp73<sup>-/-</sup>* mice in either the presence or absence of 500 nM metformin. Scale bar, 200  $\mu$ m. (G) Quantification of primary neurospheres from both genotypes following metformin exposure was done based on representative micrographs shown in (F).  $**p \leq 0.01$  (pooled data from four independent experiments). (H) Primary

neurospheres cultured with or without metformin (as in A) from both genotypes were passaged into untreated media, and secondary neurospheres were counted 4 days later.  $**p \leq 0.01$  (pooled data from four independent experiments).

(I) Confocal micrographs of representative coronal sections through the lateral ventricles of metformin- or PBS-injected *TAp73<sup>+/+</sup>* and *TAp73<sup>-/-</sup>* mice, stained for BrdU (green) 24 hr after BrdU injection. Sections are counterstained for Hoechst 33258 (blue). Scale bar, 100  $\mu$ m.

(J and K) Quantification of the total number of BrdU-positive (BrdU+ve) cells in the SVZ (J) and SGZ (K) of metformin- or PBS-treated mice of both genotypes, as pictured in (I).  $***p \leq 0.001$ ;  $**p \leq 0.01$  (pooled data from three independent experiments). Error bars indicate SEM.

### The AMPK-aPKC-CBP Pathway Mediates the Metformin-Induced Increase in Neuronal Differentiation of Adult NPCs and Not Self-Renewal or Proliferation

We previously demonstrated that metformin promoted the differentiation of embryonic NPCs and that this was inhibited by genetic knockdown of either aPKCs or CBP (Wang et al., 2012). To ask whether this same pathway

was essential for the differentiation of adult NPCs, we took advantage of two knockin mouse models that specifically target the aPKC-CBP pathway; the phospho-mutant *CBPS436A-KI* mouse and a phospho-competent *p300G422S* knockin mouse (*p300G422S-KI*). *p300G422S* encodes a mutationally generated aPKC phosphorylation site in the CBP homolog p300, which normally lacks this aPKC site (He et al., 2009, 2012). While the *CBPS436A*

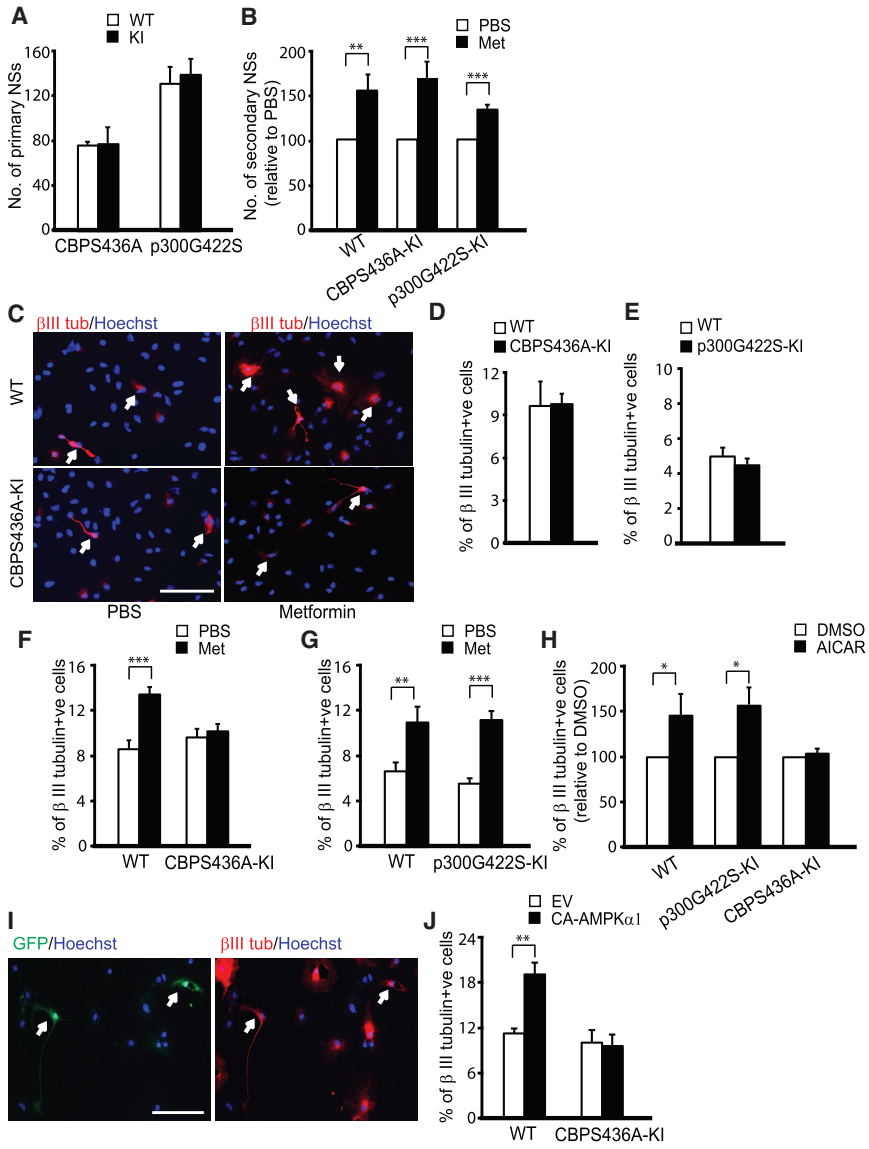

**Figure 3. Metformin Enhances Neuronal Differentiation of Adult Neural Precursors by Activating the aPKC-CBP Pathway**

(A) Quantification of primary neurosphere (NS) number cultured from 3-month-old *CBPS436A-KI* and *p300G422S-KI* (KI) mice (pooled data from four independent experiments).

(B) Quantification of the secondary neurosphere number from *CBPS436A-KI* and *p300G422S-KI* mice in the absence and presence of metformin (Met). \*\* $p < 0.01$ ; \*\*\* $p < 0.001$  (pooled data from four independent experiments).

(C) Immunofluorescence images of  $\beta$ III-tubulin-positive neurons generated from SVZ WT and *CBPS436A-KI* neurospheres in the absence and presence of metformin. Arrows denote  $\beta$ III-tubulin-positive cells. Scale bar, 20  $\mu$ m.

(D and E) Quantitative analysis of the percentage of  $\beta$ III-tubulin-positive ( $\beta$  III tubulin+ve) neurons generated from *CBPS436A-KI* neurospheres (D) and *p300G422S-KI* neurospheres (E), determined as shown in (C). (pooled data from four independent experiments).

(F and G) Quantitative analysis of the percentage of  $\beta$ III-tubulin ( $\beta$ III tub) positive neurons generated from SVZ WT and *CBPS436A-KI* (F) and *p300G422S* (G) neurospheres in the absence and presence of metformin (200 nM). \*\*\* $p < 0.001$ ; \*\* $p < 0.01$  (pooled data from four independent experiments).

(H) Quantitative analysis of the percentage of  $\beta$ III-tubulin-positive neurons generated from SVZ WT, *CBPS436A-KI*, and *p300G422S-KI* neurospheres in the absence and presence of AICAR (500 nM). \* $p < 0.05$  (pooled data from four independent experiments).

(I) Immunofluorescence images of GFP-positive,  $\beta$ III-tubulin-positive neurons generated from SVZ WT neurospheres transfected with *CA-AMPK $\alpha$ 1*. Arrows denote GFP-positive,  $\beta$ III-tubulin-positive cells. Scale bar, 20  $\mu$ m.

(J) Quantification of the percentage of transfected,  $\beta$ III-tubulin-positive neurons generated from SVZ WT and *CBPS436A-KI* neurospheres. EV, empty vector, *CA-AMPK $\alpha$ 1*, constitutively active AMPK  $\alpha$ 1 subunit. \*\* $p < 0.01$  (pooled data from four independent experiments). Error bars indicate SEM.

mouse encodes a loss-of-function mutation in the aPKC-CBP pathway, the *p300G422S* mouse functioned as an additional WT control in our experiments.

To determine the effect of aPKC-CBP signaling on the proliferation, self-renewal, and differentiation of adult NPCs, we cultured and quantified neurospheres from the SVZ of adult mice of these different genotypes. The number and size of neurospheres were similar in all cases (Figures 3A and 3B), suggesting that the aPKC-CBP pathway is

not required for NPC self-renewal or proliferation. Then, we differentiated these neurospheres in the presence or absence of metformin and quantified the number of neurons that were generated by immunostaining for  $\beta$ III-tubulin (Figure 3C). In the absence of metformin, *CBPS436A-KI* and *p300G422S-KI* neurospheres generated similar numbers of newborn neurons relative to WT controls (Figures 3C–3E). In contrast, metformin did not increase neuronal differentiation from *CBPS436A-KI*

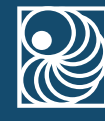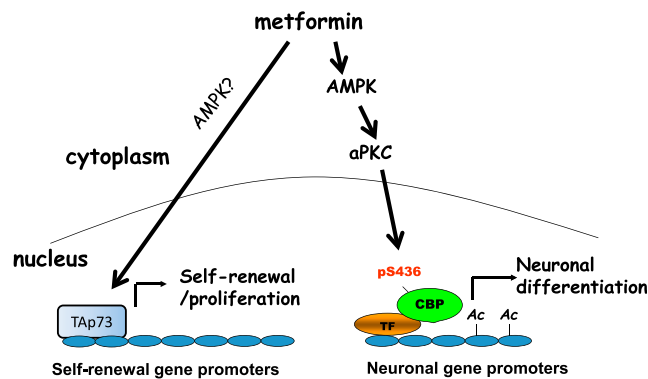

**Figure 4. Model Describing Two Distinct Molecular Pathways Mediating Metformin-Induced Proliferation/Self-Renewal and Neuronal Differentiation**

TF, transcription factors; Ac, acetylation.

neurospheres as it did from control (Figure 3F) or *p300G422S-KI* neurospheres (Figure 3G). Thus, metformin requires the aPKC-CBP pathway to enhance the genesis of neurons from adult NPCs.

To determine whether the aPKC-CBP pathway was activated by the metformin target AMPK, we first asked whether a second AMPK activator, AICAR, had similar effects as metformin. Quantification showed that 500 nM AICAR increased the proportion of newborn neurons in WT and *p300G422S-KI* cultures (Figure 3H), while it had no effect on the *CBPS436A-KI* cultures (Figure 3H). Second, we overexpressed a constitutively active AMPK alpha1 subunit (CA-AMPK $\alpha$ 1) in cultured adult NPCs and observed an increase in the proportion of newborn neurons in WT but not *CBPS436A-KI* cultures (Figures 3I and 3J). Thus, AMPK activation is sufficient to enhance neurogenesis, and this requires the aPKC-CBP pathway.

## DISCUSSION

The data presented here support four major conclusions. First, metformin treatment enhances the proliferation, self-renewal, and neuronal differentiation of adult NPCs. Second, metformin treatment stimulates TAp73 gene expression in adult NPCs, and TAp73 is required for the metformin-induced proliferation and self-renewal of adult NPCs. Third, metformin requires the aPKC-mediated CBP S436 phosphorylation to induce neuronal differentiation of adult NPCs. Finally, AMPK activation stimulates adult NPC neuronal differentiation by activating the aPKC-CBP pathway.

We previously showed that metformin treatment enhances murine adult neurogenesis *in vivo* without depleting the endogenous NPC pool (Wang et al., 2012). This finding has led to studies to repurpose metformin as a neurogen-

erative agent to treat the injured or degenerating brain (Liu et al., 2014; Jin et al., 2014). Our findings here provide insights into the molecular mechanisms that regulate the dual functional roles of metformin in modulating adult NPC biology. Metformin treatment acts on two distinct molecular pathways to promote proliferation/regeneration and differentiation of adult NPCs, respectively. Our previous study identified TAp73 as an essential protein for adult NPC self-renewal (Fujitani et al., 2010). Here, we show that TAp73 is required for metformin to promote the proliferation and self-renewal of adult NPCs and to expand the NPC population *in vivo*. p73 is known to enhance the expression of self-renewal genes such as *Sox2* and *Notch* family members in embryonic neurospheres (Talos et al., 2010). TAp73 also is a known tumor suppressor (Irwin et al., 2003), so the metformin-mediated increase in its activity should not increase the possibility of tumorigenesis. The second pathway regulated by metformin is one that we previously identified in NPCs, the aPKC-CBP pathway (Wang et al., 2012). This pathway is likely not involved in metformin-induced NPC proliferation and self-renewal but is essential for metformin-induced neuronal differentiation. Moreover, we found that AMPK is an upstream kinase that stimulates the aPKC-CBP pathway to promote neuronal differentiation. Although the germline AMPK  $\beta$  subunit knockout mice have been shown to have perturbed embryonic NPC biology (Dasgupta and Milbrandt, 2009), our study is the first to assess the role of AMPK activity in adult NPC fate decisions. Together, these results indicate that metformin activates two signaling pathways in NPCs: a TAp73 pathway that mediates self-renewal and proliferation and an AMPK-aPKC-CBP pathway that is required for neuronal differentiation (Figure 4).

One interesting finding in this study is that initial treatment of metformin in primary neurospheres not only increases the number and size of primary neurospheres but also enhances the number and size of secondary and tertiary neurospheres cultured in the absence of metformin. These data imply that metformin could be used *ex vivo* to expand exogenous neural stem cells before transplantation and that these neural stem cells will continually expand *in vivo* after transplantation. Therefore, metformin might be an ideal preconditioning reagent to improve neuroregenerative efficiency of transplanted exogenous neural stem cells *in vivo* for the treatment of brain injury and neurodegenerative diseases.

Our study also demonstrates that the aPKC-mediated single phosphorylation of CBP serves as a signaling sensor that responds to micro-environmental changes to fine-tune neuronal differentiation of adult NPCs. This CBP phosphorylation may directly alter CBP histone acetyltransferase activity or chromatin binding. Identification of downstream targets of the aPKC-CBP pathway at both

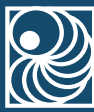

genomic and epigenomic levels will be the subject of our future work.

## EXPERIMENTAL PROCEDURES

### Animals

All animal use was approved by the animal care committees of the Hospital for Sick Children and the University of Ottawa in accordance with the Canadian Council of Animal Care policies. *TAp73<sup>-/-</sup>*, *CBPS436A*, and *p300G422S* mice were maintained on a 12-hr/12-hr light/dark cycle with ad libitum access to food and water.

### BrdU Labeling

To quantify proliferating precursors in the SVZ and SGZ, adult mice were injected i.p. with a single dose of BrdU (Sigma-Aldrich) at 100 mg/kg. Animals were sacrificed 24 hr later via sodium pentobarbital overdose and transcardially perfused with PBS followed by 4% paraformaldehyde. Brains were processed for immunostaining as previously described (Wang et al., 2012), which is detailed in the Supplemental Experimental Procedures.

### Neurosphere Culture and Transfection

For adult SVZ cultures, the subependyma of the lateral ventricles was dissected out as previously described (Fujitani et al., 2010). Cell density and viability were determined via trypan blue exclusion and a hemocytometer. Freshly isolated cells were then plated at a density of ten cells per microliter in six-well (2 ml per well) ultra-low attachment plates (Corning) in serum-free medium (SFM) containing 20 ng/ml epidermal growth factor (EGF; Sigma-Aldrich), 10 ng/ $\mu$ l fibroblast growth factor 2 (FGF2; Sigma-Aldrich), 1  $\times$  B27 (Becton Dickinson; BD), and 2  $\mu$ g/ml heparin (Sigma-Aldrich). Primary neurospheres were counted on day 6 after dissection, with only spheres composed of over 50 cells being counted. Sphere diameter was quantified using Northern Eclipse software (Empix), by drawing a line through the length of each sphere at 6 days of culture. To assess self-renewal, neurospheres were passaged either once or twice by mechanical dissociation, passed through a 40- $\mu$ m cell strainer, plated at a density of two cells per microliter, and counted 4 days later. All neurosphere experiments were performed in triplicate wells, and results are representative of at least three independent experiments. For the differentiation assay, individual neurospheres were collected, gently triturated, and plated onto poly-L-ornithine (Sigma)- and laminin (BD)-coated wells in the presence of 10% FBS with SFM for 7 days. To assess NPC apoptosis, secondary neurospheres were grouped, gently triturated, and plated onto poly-L-Ornithine (Sigma) and laminin (BD)-coated wells in the presence of SFM containing 20 ng/ml EGF, 10 ng/ $\mu$ l FGF2, 1  $\times$  B27, and 2  $\mu$ g/ml heparin for 2 days. Metformin stock solution (1 mM) was made in PBS, AICAR stock solution (5 mM) was made in DMSO, and chelerythrine stock solution (1 mM) was made in DMSO. All these drugs were added to the cultures at various stages of cultures as indicated. For transfection, detailed information was described in Supplemental Experimental Procedures.

### qRT-PCR

qRT-PCR was performed as previously described (Cancino et al., 2015). Detailed information was described in Supplemental Experimental Procedures.

### Immunocytochemistry, Microscopy, and Quantification

Detailed information is described in Supplemental Experimental Procedures.

## SUPPLEMENTAL INFORMATION

Supplemental Information includes Supplemental Experimental Procedures and one figure and can be found with this article online at <http://dx.doi.org/10.1016/j.stemcr.2015.10.014>.

## AUTHOR CONTRIBUTIONS

M.P.F. performed adult neurosphere assays and BrdU in vivo labeling; K.H. performed adult neurosphere assays and differentiation assays; L.H. and F.W. generated *CBPS436A-KI* and *p300G422S-KI* mouse strains; and M.F., K.H., F.D.M., D.R.K., and J.W. contributed to experimental design, data interpretation, and writing the paper.

## ACKNOWLEDGMENTS

This work was supported by the J.P. Bickell Foundation, by OHRI internal start-up funding to J.W., and by a Canadian Institutes of Health research grant to F.D.M. and D.R.K. F.D.M. and D.R.K. are Canada Research Chairs, and F.D.M. is a Howard Hughes Medical Institute International Research Scholar.

Received: July 11, 2015

Revised: October 23, 2015

Accepted: October 26, 2015

Published: November 19, 2015

## REFERENCES

- Cancino, G.I., Fatt, M.P., Miller, F.D., and Kaplan, D.R. (2015). Conditional ablation of p63 indicates that it is essential for embryonic development of the central nervous system. *Cell Cycle*. Published online September 11, 2015. PMID: 26359534.
- Dasgupta, B., and Milbrandt, J. (2009). AMP-activated protein kinase phosphorylates retinoblastoma protein to control mammalian brain development. *Dev. Cell* 16, 256–270.
- Engelmann, D., Meier, C., Alla, V., and Pützer, B.M. (2015). A balancing act: orchestrating amino-truncated and full-length p73 variants as decisive factors in cancer progression. *Oncogene* 34, 4287–4299.
- Fujitani, M., Cancino, G.I., Dugani, C.B., Weaver, I.C., Gauthier-Fisher, A., Paquin, A., Mak, T.W., Wojtowicz, M.J., Miller, F.D., and Kaplan, D.R. (2010). TAp73 acts via the bHLH Hey2 to promote long-term maintenance of neural precursors. *Curr. Biol.* 20, 2058–2065.
- He, L., Sabet, A., Djedjos, S., Miller, R., Sun, X., Hussain, M.A., Radovick, S., and Wondisford, F.E. (2009). Metformin and insulin

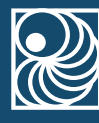

- suppress hepatic gluconeogenesis through phosphorylation of CREB binding protein. *Cell* 137, 635–646.
- He, L., Naik, K., Meng, S., Cao, J., Sidhaye, A.R., Ma, A., Radovick, S., and Wondisford, F.E. (2012). Transcriptional co-activator p300 maintains basal hepatic gluconeogenesis. *J. Biol. Chem.* 287, 32069–32077.
- Imayoshi, I., Sakamoto, M., Ohtsuka, T., Takao, K., Miyakawa, T., Yamaguchi, M., Mori, K., Ikeda, T., Itohara, S., and Kageyama, R. (2008). Roles of continuous neurogenesis in the structural and functional integrity of the adult forebrain. *Nat. Neurosci.* 11, 1153–1161.
- Irwin, M.S., Kondo, K., Marin, M.C., Cheng, L.S., Hahn, W.C., and Kaelin, W.G., Jr. (2003). Chemosensitivity linked to p73 function. *Cancer Cell* 3, 403–410.
- Jin, Q., Cheng, J., Liu, Y., Wu, J., Wang, X., Wei, S., Zhou, X., Qin, Z., Jia, J., and Zhen, X. (2014). Improvement of functional recovery by chronic metformin treatment is associated with enhanced alternative activation of microglia/macrophages and increased angiogenesis and neurogenesis following experimental stroke. *Brain Behav. Immun.* 40, 131–142.
- Kernie, S.G., and Parent, J.M. (2010). Forebrain neurogenesis after focal Ischemic and traumatic brain injury. *Neurobiol. Dis.* 37, 267–274.
- Liu, Y., Tang, G., Zhang, Z., Wang, Y., and Yang, G.Y. (2014). Metformin promotes focal angiogenesis and neurogenesis in mice following middle cerebral artery occlusion. *Neurosci. Lett.* 579, 46–51.
- Mitchell, B.D., Emsley, J.G., Magavi, S.S., Arlotta, P., and Macklis, J.D. (2004). Constitutive and induced neurogenesis in the adult mammalian brain: manipulation of endogenous precursors toward CNS repair. *Dev. Neurosci.* 26, 101–117.
- Pernicova, I., and Korbonits, M. (2014). Metformin—mode of action and clinical implications for diabetes and cancer. *Nat. Rev. Endocrinol.* 10, 143–156.
- Reynolds, B.A., and Weiss, S. (1992). Generation of neurons and astrocytes from isolated cells of the adult mammalian central nervous system. *Science* 255, 1707–1710.
- Rosenbluth, J.M., Mays, D.J., Pino, M.F., Tang, L.J., and Pietenpol, J.A. (2008). A gene signature-based approach identifies mTOR as a regulator of p73. *Mol. Cell. Biol.* 28, 5951–5964.
- Talos, F., Abraham, A., Vaseva, A.V., Holembowski, L., Tsirka, S.E., Scheel, A., Bode, D., Dobbelstein, M., Brück, W., and Moll, U.M. (2010). p73 is an essential regulator of neural stem cell maintenance in embryonal and adult CNS neurogenesis. *Cell Death Differ.* 17, 1816–1829.
- Tomasini, R., Tsuchihara, K., Wilhelm, M., Fujitani, M., Rufini, A., Cheung, C.C., Khan, F., Itie-Youten, A., Wakeham, A., Tsao, M.S., et al. (2008). Tap73 knockout shows genomic instability with infertility and tumor suppressor functions. *Genes Dev.* 22, 2677–2691.
- Wang, J., Gallagher, D., DeVito, L.M., Cancino, G.I., Tsui, D., He, L., Keller, G.M., Frankland, P.W., Kaplan, D.R., and Miller, F.D. (2012). Metformin activates an atypical PKC-CBP pathway to promote neurogenesis and enhance spatial memory formation. *Cell Stem Cell* 11, 23–35.
- Zhao, C., Deng, W., and Gage, F.H. (2008). Mechanisms and functional implications of adult neurogenesis. *Cell* 132, 645–660.
- Zhou, X.Y., Shibusawa, N., Naik, K., Porras, D., Temple, K., Ou, H., Kaihara, K., Roe, M.W., Brady, M.J., and Wondisford, F.E. (2004). Insulin regulation of hepatic gluconeogenesis through phosphorylation of CREB-binding protein. *Nat. Med.* 10, 633–637.



**Stem Cell Reports, Volume 5**

**Supplemental Information**

**Metformin Acts on Two Different Molecular Pathways to  
Enhance Adult Neural Precursor Proliferation/Self-Renewal  
and Differentiation**

**Michael Fatt, Karolynn Hsu, Ling He, Fredric Wondisford, Freda D. Miller, David R.  
Kaplan, and Jing Wang**

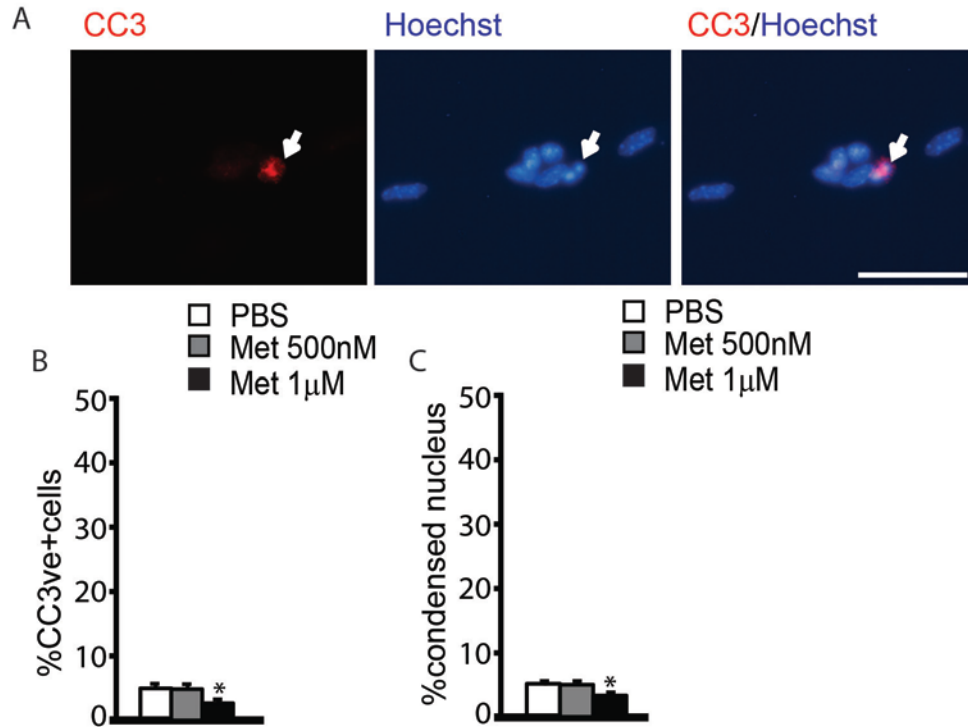

**Figure S1. Metformin enhances adult NPC survival in a dose-dependent manner, related to**

**Figure 1.** (A-C) monolayer adult NPCs were cultured in proliferating SFM in the presence or absence of 500nM-1uM metformin and quantified 2 days later, as pictured in (A). Scale bar = 100µm. (B) Quantification of the percentage of cleaved caspase 3 (CC3) following metformin or PBS exposure as in (A). \*  $p \leq 0.05$  (n = 3 for each group) (C) Quantification of the percentage of condensed nuclei following metformin or PBS exposure, as in (A). \*  $p \leq 0.05$  (n =3 for each group).

## **Supplemental Experimental Procedures:**

### **BrdU labeling**

Brains were post-fixed overnight in 4% PFA, dehydrated in 30% sucrose, and sectioned at 20  $\mu\text{m}$  using a Leica CM1850 cryostat (Leica Biosystems, Concord, ON, Canada). BrdU immunostaining was performed as previously described (Wang et al., 2012). Sections were post-fixed with 4% PFA, incubated in 1 N HCl for 30 min at 60°C, blocked and permeabilized with 5% BSA and 0.3% Triton-X. Sections were incubated with anti-BrdU antibody at 4°C overnight, detected using an anti-rat secondary antibody, counterstained with Hoechst 33258 (1:2000, Sigma-Aldrich) and mounted with GelTol (Fisher).

### **Transfections**

For overexpression of *CA-AMPK $\alpha$ 1*, individual NPCs derived from secondary neurospheres were plated onto poly-L-Ornithine (Sigma) and laminin (BD)-coated wells in the presence of serum-free medium (SFM) containing 20 ng/ml EGF (Sigma-Aldrich), 10 ng/ $\mu\text{l}$  FGF2 (Sigma-Aldrich), 1x B27 (BD) and 2  $\mu\text{g/ml}$  heparin (Sigma-Aldrich) at the density of 100,000 cells/well for 24-well plates. Then, 0.6  $\mu\text{g}$  DNA (1:2 ratio of *PB-CAG-eGFP* versus *CA-AMPK $\alpha$ 1* or *Empty Vector* plasmids) and 1.8  $\mu\text{l}$  TransIT-X2 (Mirus) were mixed with 50  $\mu\text{l}$  DMEM/F12 medium, incubated for 30 min and added to NPCs 24 h after plating. 24h after transfection, the culture medium were changed to SFM containing 10% FBS for another 7 days. The rat *CA-AMPK $\alpha$ 1* construct was purchased from addgenes (plasmid #27632) and subcloned into pcDNA3.1(+) backbone.

### **Quantitative RT-PCR**

RNA was extracted from metformin- or PBS-exposed primary neurospheres using the E.Z.N.A. Total RNA Kit I (Omega Bio-Tek, Norcross, GA) and was treated with DNase I using the

E.Z.N.A RNase-free DNase I Set (Omega Bio-Tek). cDNA was synthesized from 1µg total RNA using RevertAid H Minus M-MuLV Reverse Transcriptase (Fermentas, Thermo Scientific, Waltham, MA, USA), and quantitative PCR was performed using Lightcycler 480 SYBR Green I Master mix (Roche, Laval, QC, Canada), following the manufacturer's instructions. The following primers were used for quantitative PCR: TAp73F – GCACCTACTTTGACCTCCCC, TAp73R – GCACTGCTGAGCAAATTGAAC, GAPDHF – GGGTGTGAACCACGAGAAATA, GAPDHR – CTGTGGTCATGAGCCCTTC. GAPDH mRNA was used as an endogenous control for all reactions, and all reactions were run in triplicate. Quantitative PCRs were run on C1000 Touch Thermal Cycler (Bio-Rad, Hercules, CA, USA), and analyzed using Bio-Rad CFX Manager Software (Bio-Rad).

### **Immunocytochemistry, microscopy, and quantification**

For immunocytochemistry, the cultured cells were fixed with 4% PFA, blocked, and permeabilized with 10% normal goat serum (NGS) and 0.3% Triton-X. Fixed cells were then incubated with primary antibodies at 4°C overnight, with secondary antibodies at room temperature for 1 hour, counterstained with Hoechst 33258 (1:2000, Sigma-Aldrich) and mounted with GelTol (Fisher).

Digital image acquisition was performed using Zeiss AxioScope with AxioVision software (Zeiss). For quantification of precursor cells *in vivo*, hippocampi and SVZ regions were serially sectioned as previously described (Fujitani et al., 2010). BrdU-positive precursors in the hippocampi were counted in every 10th section throughout the entirety of the structure. Counts were then normalized by multiplying for the total number of sections. BrdU-positive precursors in the SVZ regions were counted in a similar manner as described for the hippocampus. Counts were then normalized by multiplying for the total number of sections. For quantification of

neuronal differentiation in culture, more than 400 cells per condition in at least 6 randomly chosen fields per experiment were counted. Statistical analyses were performed using a two-tailed Student's t test, unless indicated otherwise. In all cases, error bars indicate the standard error of the mean (SEM).

### **Antibodies**

The primary antibodies used were rat anti-BrdU (1:200; Accurate Chemical, Cat# OBT0030G), mouse anti- $\beta$ III-tubulin (1:500; Covance, Cat# MMS-435P), rabbit anti-cleaved caspase 3 (1:1000; Cell Signaling Tech, Cat #9661), chicken anti-GFP (1:1000; Abcam, Cat#ab13970).

The secondary antibodies used were Alexa Fluor 488-conjugated goat anti-rat IgG (1:1000; Cell Signaling Tech, Cat #4416), Alexa Fluor 555-conjugated goat anti-mouse IgG (1:1000; Cell Signaling Tech, Cat #4409), Alexa Fluor 488-conjugated goat anti-chicken IgG (1:1000; Life Tech, Cat #11039), Alexa Fluor 555-conjugated goat anti-rabbit IgG (1:1000; Cell Signaling Tech, Cat #4413).

### **References**

Fujitani, M., Cancino, G.I., Dugani, C.B., Weaver, I.C., Gauthier-Fisher, A., Paquin, A., Mak, T.W., Wojtowicz, M.J., Miller, F.D. and Kaplan, D.R. (2010) TAp73 acts via the bHLH Hey2 to promote long-term maintenance of neural precursors. *Curr. Biol.* 20, 2058–2065.
